# Supplementary material for: Assessment of Seasonal Changes on the Carbon Cycle in the Critical Zone of a Surface Water (SW)–Groundwater (GW) System
Source: MDPI journal article supplement (doi:10.3390/w14213372), 2022-10-24
Supplement: s1 [file s1]

Article

# Assessment of Seasonal Changes on the Carbon Cycle in the Critical Zone of a Surface Water (SW) – Groundwater (GW) System

## Supplementary material

Igor Karlović <sup>1</sup>, Tamara Marković <sup>1,\*</sup>, Tjaša Kanduč <sup>2</sup> and Polona Vreča <sup>2</sup>

<sup>1</sup> Croatian Geological Survey, Sachsova 2, 10000 Zagreb, Croatia

<sup>2</sup> Department of Environmental Sciences, Jožef Stefan Institute, Jamova cesta 39, SI-1000 Ljubljana, Slovenia

\* Correspondence: tmarkovic@hgi-cgs.hr

**Table S1.**  $\delta^{13}\text{C}_{\text{DIC}}$  values (‰) in water samples.

| Site     | Type | Date    | $\delta^{13}\text{C}_{\text{DIC}}$ (‰) |       | Site                       | Type          | Date   | $\delta^{13}\text{C}_{\text{DIC}}$ (‰) |     |
|----------|------|---------|----------------------------------------|-------|----------------------------|---------------|--------|----------------------------------------|-----|
|          |      |         | mean                                   | SD    |                            |               |        | mean                                   | SD  |
| Hrašćica | GW   | Sep-18  | -12.1                                  | 0.2   | P-1556                     | GW            | Sep-18 | -10.7                                  | 0.1 |
|          |      | deep    | Dec-18                                 | -12.9 |                            |               | Dec-18 | -11.7                                  | 0.0 |
|          |      | Apr-19  | -12.3                                  | 0.1   |                            | shallow       | Apr-19 | -13.9                                  | 0.0 |
|          |      | Jun-19  | -12.4                                  | 0.1   |                            |               | Jun-19 | -13.5                                  | 0.1 |
|          |      | Sep-19  | -12.0                                  | 0.1   |                            |               | Sep-19 | -13.9                                  | 0.1 |
| PDS-5    | GW   | Sep-18  | -11.2                                  | 0.1   | P-2500                     | GW            | Sep-18 | -13.6                                  | 0.1 |
|          |      | deep    | Dec-18                                 | -11.8 |                            |               | Dec-18 | -14.0                                  | 0.3 |
|          |      | Apr-19  | -11.1                                  | 0.1   |                            | shallow       | Apr-19 | -12.8                                  | 0.0 |
|          |      | Jun-19  | -11.4                                  | 0.1   |                            |               | Jun-19 | -13.8                                  | 0.1 |
|          |      | Sep-19  | -11.1                                  | 0.1   |                            |               | Sep-19 | -13.0                                  | 0.0 |
| PDS-6    | GW   | Sep-18  | -12.2                                  | 0.0   | P-4039                     | GW            | Sep-18 | -13.8                                  | 0.0 |
|          |      | deep    | Dec-18                                 | -12.8 |                            |               | Dec-18 | -14.5                                  | 0.1 |
|          |      | Apr-19  | -11.7                                  | 0.1   |                            | shallow       | Apr-19 | -12.5                                  | 0.0 |
|          |      | Jun-19  | -11.9                                  | 0.0   |                            |               | Jun-19 | -13.5                                  | 0.1 |
|          |      | Sep-19  | -11.8                                  | 0.1   |                            |               | Sep-19 | -14.0                                  | 0.1 |
| PDS-7    | GW   | Sep-18  | -11.4                                  | 0.1   | Drava<br>River             | SW            | Sep-18 | -11.3                                  | 0.5 |
|          |      | deep    | Dec-18                                 | -11.7 |                            |               | Dec-18 | -11.9                                  | 0.5 |
|          |      | Apr-19  | -11.1                                  | 0.0   |                            |               | Apr-19 | -10.6                                  | 0.2 |
|          |      | Jun-19  | -11.3                                  | 0.2   |                            |               | Jun-19 | -12.1                                  | 0.2 |
|          |      | Sep-19  | -10.9                                  | 0.2   |                            |               | Sep-19 | -11.2                                  | 0.1 |
| SPV-11   | GW   | Sep-18  | -11.5                                  | 0.1   | Accum.<br>lake<br>Varaždin | SW            | Sep-18 | -9.7                                   | 0.3 |
|          |      | deep    | Dec-18                                 | -11.7 |                            |               | Dec-18 | -10.0                                  | 0.2 |
|          |      | Apr-19  | -11.1                                  | 0.1   |                            |               | Apr-19 | -9.7                                   | 0.2 |
|          |      | Jun-19  | -11.6                                  | 0.1   |                            |               | Jun-19 | -10.0                                  | 0.0 |
|          |      | Sep-19  | -11.2                                  | 0.1   |                            |               | Sep-19 | -12.2                                  | 0.1 |
| P-1529   | GW   | Sep-18  | -11.9                                  | 0.1   | Plitvica<br>stream         | SW            | Sep-18 | -12.0                                  | 0.0 |
|          |      | shallow | Dec-18                                 | -13.3 |                            |               | Dec-18 | -12.0                                  | 0.1 |
|          |      | Apr-19  | -11.8                                  | 0.1   |                            |               | Apr-19 | -12.4                                  | 0.1 |
|          |      | Jun-19  | -12.1                                  | 0.1   |                            |               | Jun-19 | -13.5                                  | 0.0 |
|          |      | Sep-19  | -11.8                                  | 0.1   |                            |               | Sep-19 | -13.6                                  | 0.1 |
| P-1530   | GW   | Sep-18  | -12.2                                  | 0.1   | Šijanec                    | Gravel<br>pit | Sep-18 | -4.1                                   | 0.5 |
|          |      | shallow | Dec-18                                 | -12.8 |                            |               | Dec-18 | -3.7                                   | 0.2 |
|          |      | Apr-19  | -12.0                                  | 0.1   |                            |               | Apr-19 | -0.5                                   | 0.4 |
|          |      | Jun-19  | -12.4                                  | 0.1   |                            |               | Jun-19 | -2.1                                   | 0.3 |
|          |      | Sep-19  | -11.8                                  | 0.2   |                            |               | Sep-19 | -9.9                                   | 0.1 |

**Table S2.**  $\delta^{13}\text{C}$  values (‰) in solid samples.

| Sample                                                    |               | Date   | $\delta^{13}\text{C}$ (‰) |     |
|-----------------------------------------------------------|---------------|--------|---------------------------|-----|
| Type                                                      | Description   |        | mean                      | SD  |
| Plant                                                     | Grass. mix    | Sep-19 | -29.5                     | 0.1 |
|                                                           | Wheat grain   | Sep-19 | -28.4                     | 0.1 |
|                                                           | Wheat straw   | Sep-19 | -29.9                     | 0.1 |
|                                                           | Maize leaf    | Sep-19 | -12.8                     | 0.0 |
|                                                           | Maize grain   | Sep-19 | -12.8                     | 0.1 |
|                                                           | Cabbage       | Sep-19 | -27.7                     | 0.1 |
|                                                           | Potato        | Sep-19 | -27.7                     | 0.1 |
|                                                           | Pumpkin       | Sep-19 | -26.7                     | 0.0 |
| Manure                                                    | Cow           | Sep-19 | -26.3                     | 0.3 |
|                                                           | Chicken       | Sep-19 | -19.6                     | 0.0 |
| Soil<br>* $\delta^{13}\text{C}_{\text{bulk}}$             | Orchard       | Jul-18 | -27.3                     | 0.1 |
|                                                           | Corn field    | Jul-18 | -22.5                     | 0.3 |
|                                                           | Cabbage field | Jul-18 | -24.3                     | 0.1 |
|                                                           | Wheat field   | Jul-18 | -23.4                     | 0.2 |
| Soil<br>* $\delta^{13}\text{C}_{\text{org}}$              | Orchard       | Jul-18 | -27.1                     | 0.1 |
|                                                           | Corn field    | Jul-18 | -23.2                     | 0.0 |
|                                                           | Cabbage field | Jul-18 | -25.2                     | 0.5 |
|                                                           | Wheat field   | Jul-18 | -23.5                     | 0.2 |
| Aquifer sediment<br>* $\delta^{13}\text{C}_{\text{carb}}$ | Sand          | Sep-19 | 0.5                       | 0.1 |
|                                                           | Calcite       | Sep-19 | 2.2                       | 0.1 |
|                                                           | Dolomite      | Sep-19 | -2.9                      | 0.1 |

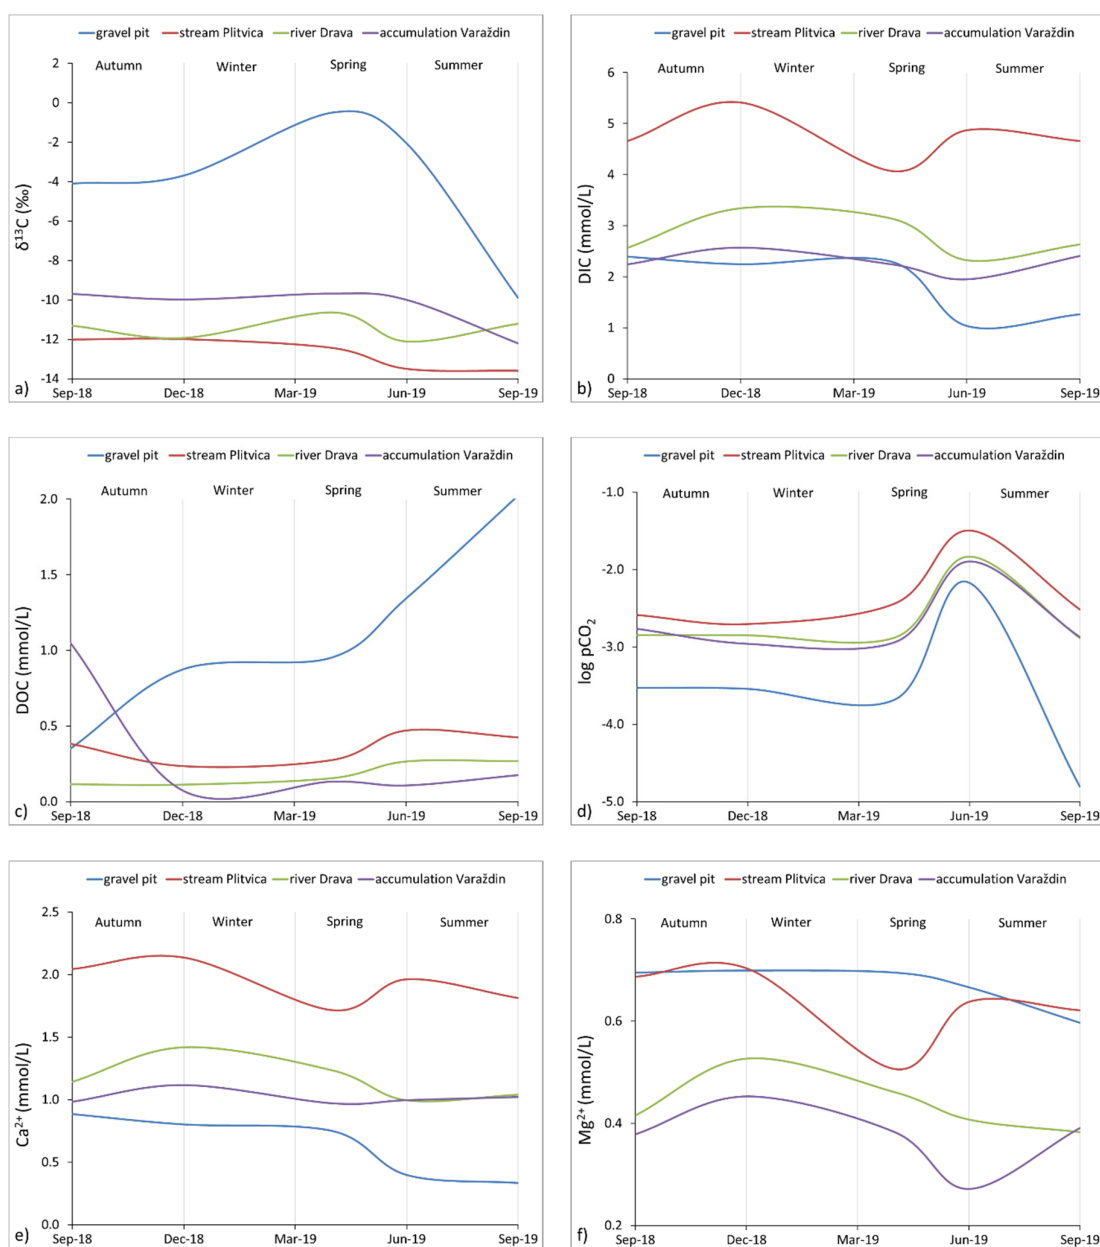

**Figure S1.** Time series of a)  $\delta^{13}\text{C}_{\text{DIC}}$ ; b) DIC; c) DOC; d)  $\log \text{pCO}_2$ ; e)  $\text{Ca}^{2+}$ ; f)  $\text{Mg}^{2+}$  in surface water

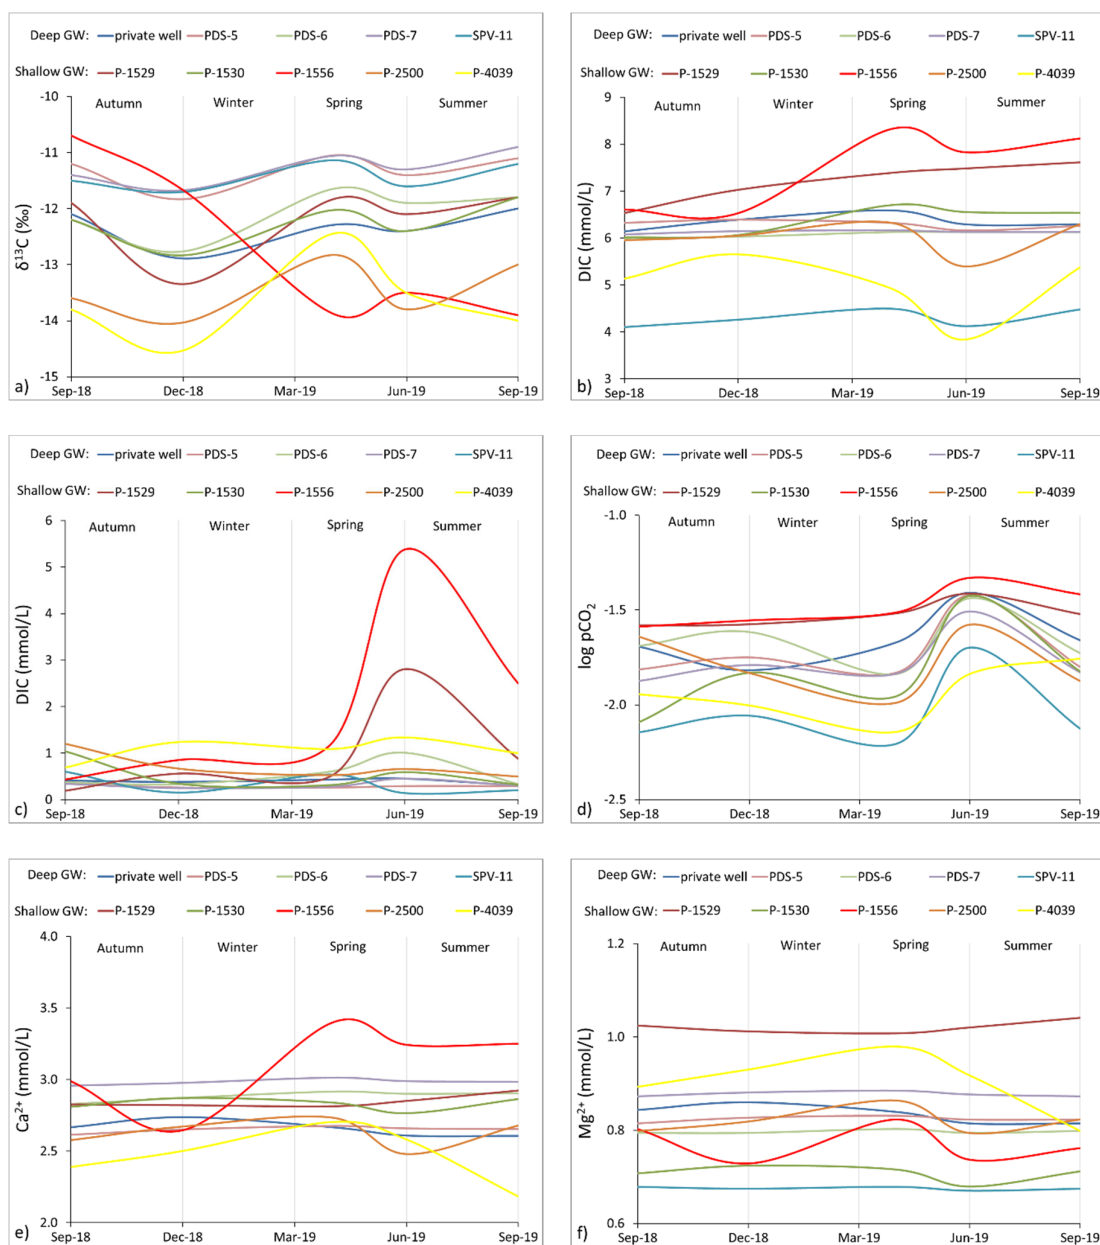

**Figure S2.** Time series of a)  $\delta^{13}\text{C}_{\text{DIC}}$ ; b) DIC; c) DOC; d) log pCO<sub>2</sub>; e) Ca<sup>2+</sup>; f) Mg<sup>2+</sup> in groundwater
